# Supplementary material
Source: PubMed Central journal article supplement (PMC1891688)
Supplement: 97320630001197S2.pdf [file 97320630001197S2.pdf]

# Bioinformation

by Biomedical Informatics Publishing Group

Let  $X_e[k]$  be the corresponding Discrete Fourier Transform as evaluated by

$$X_e[k] = \sum_{n=0}^{N-1} x_e[n] e^{(-j2\pi kn / N)}, \quad k = 0, 1, 2, \dots, N-1 \quad (4)$$

And the corresponding absolute value of the power spectrum is,

$$S_e[k] = |X_e[k]|^2 \quad (5)$$
